# Supplementary material for: Tunable multicolor photoluminescence in metal–organic halides via pressure-treatment π–π interactions
Source: Royal Society of Chemistry journal article supplement (doi:10.1039/d5tc04267d), 2026-01-01
Supplement: d5tc04267d1.pdf [file d5tc04267d1.pdf]

## **Tunable Multicolor Photoluminescence in Metal–Organic Halides via Pressure-Treatment $\pi$ - $\pi$ Interactions**

Zhiyuan Ma,<sup>a</sup> Chunjie Xie,<sup>a</sup> Mengmeng Jiao,<sup>a</sup> Chuanlu Yang,<sup>a</sup> Kai Wang<sup>b</sup> and Qinfeng Xu, \*<sup>a</sup>

<sup>a</sup>School of Physics and Optoelectronic Engineering, Ludong University, Yantai 264025, China

<sup>b</sup>School of Physics Science and Information Technology, Liaocheng University, Liaocheng 252000, China

\*[xuqf5678@163.com](mailto:xuqf5678@163.com)

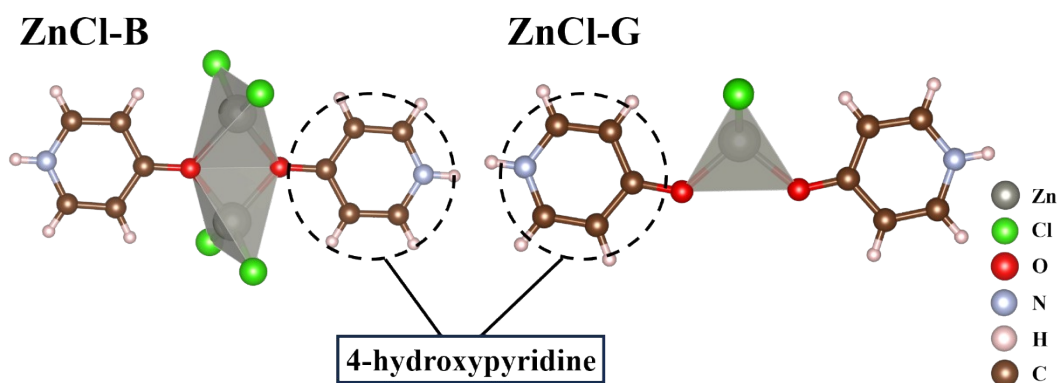

**Fig S1.** The crystal structure of mononuclear ZnCl-G and binuclear ZnCl

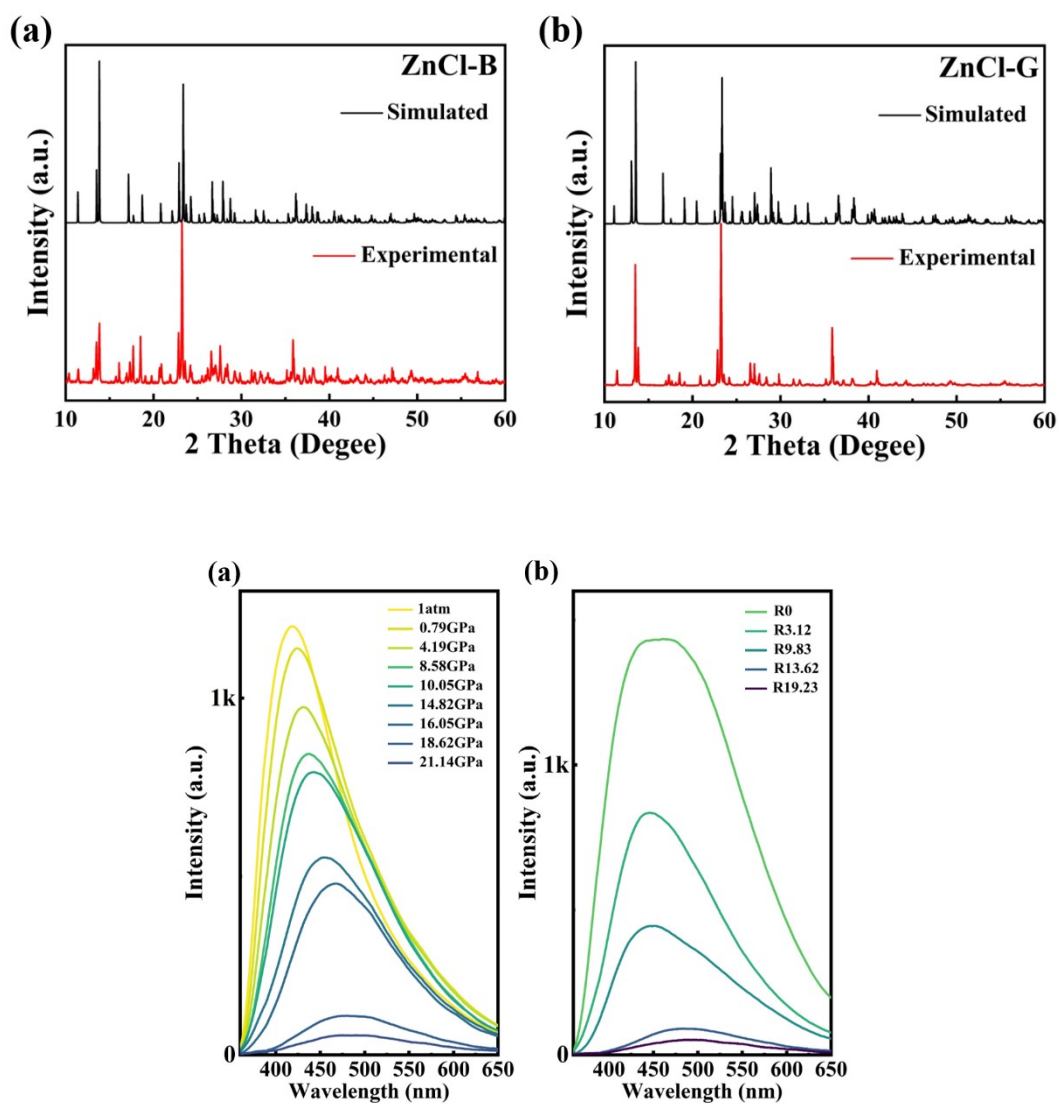

**Fig S2.** (a) XRD patterns of ZnCl-B, (b) XRD patterns of Zn-G.

**Fig S3.** (a) PL spectra of ZnCl-G in the pressure range of 1 atm-21.14 GPa. (b) PL spectra of ZnCl-G during decompression.

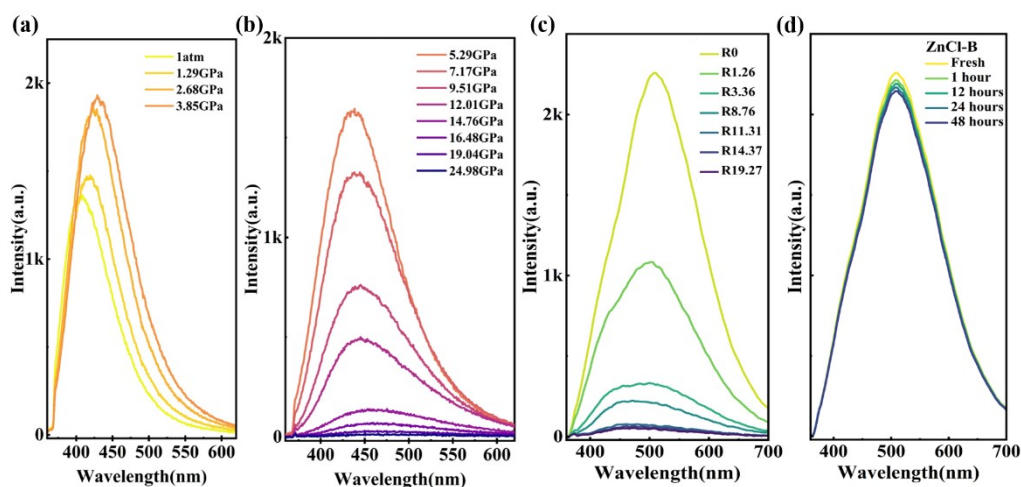

**Fig S4.** (a) PL spectra of ZnCl-B under pressure from 1 atm to 3.85 GPa. (b) PL spectra of ZnCl-B under pressure from 5.29 GPa to 24.98 GPa. (c) PL spectra of ZnCl-B during decompression. (d) PL spectra of ZnCl-B after 25 GPa pressure treatment with different resting times

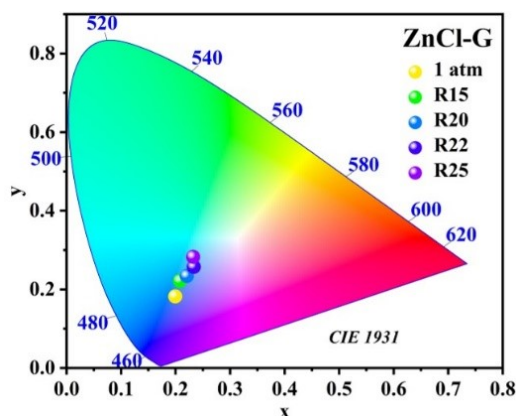

**Fig S5.** Chromaticity coordinate diagram of ZnCl-G at 1 atm and after pressure treatment

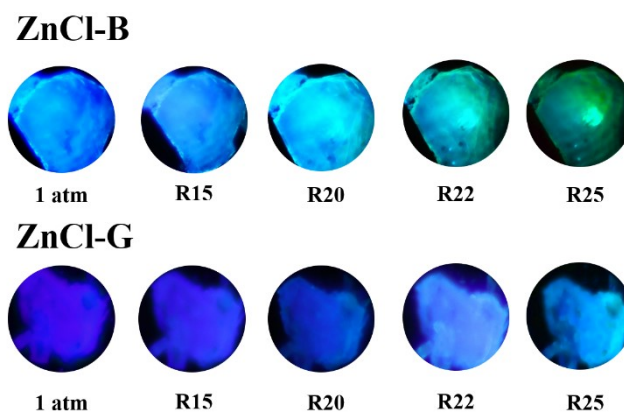

**Fig S6** The PL photos of ZnCl-G/B after different pressure treatments

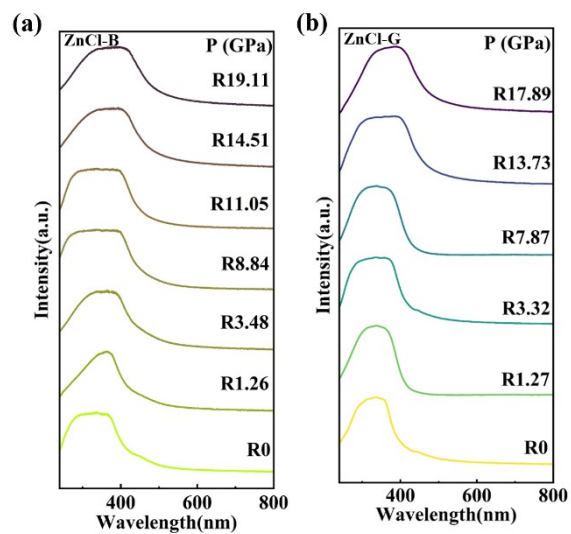

**Fig S7.** (a) UV-vis absorption spectra of ZnCl-B during decompression, (b) UV-vis absorption spectra of ZnCl-G during decompression.

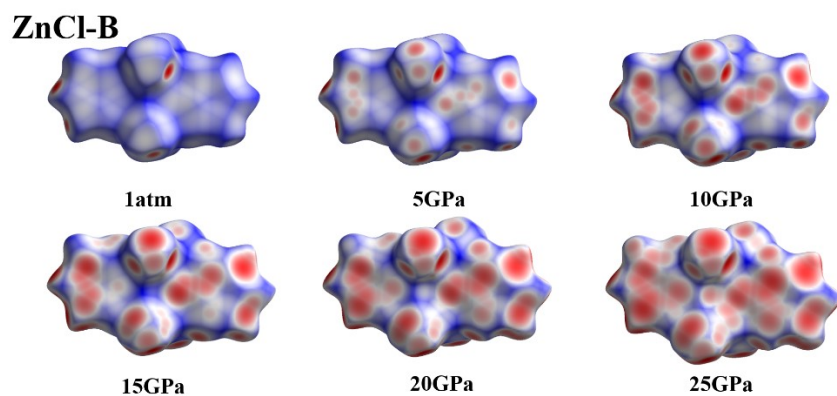

**Fig S8.** Hirshfeld surface for the refined structure of ZnCl-B under pressure.

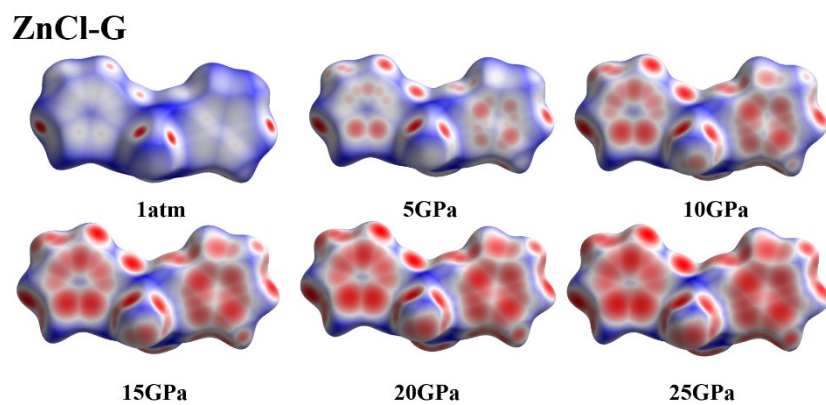

**Fig S9.** Hirshfeld surface for the refined structure of ZnCl-G under pressure.

## ZnCl-G

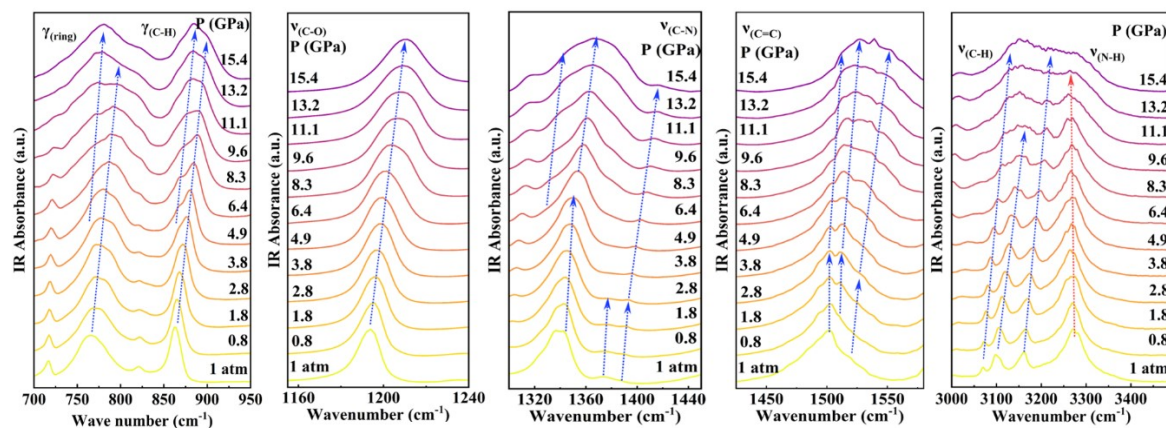

**Fig S10.** The IR spectra of ZnCl-G during compression.

## ZnCl-G

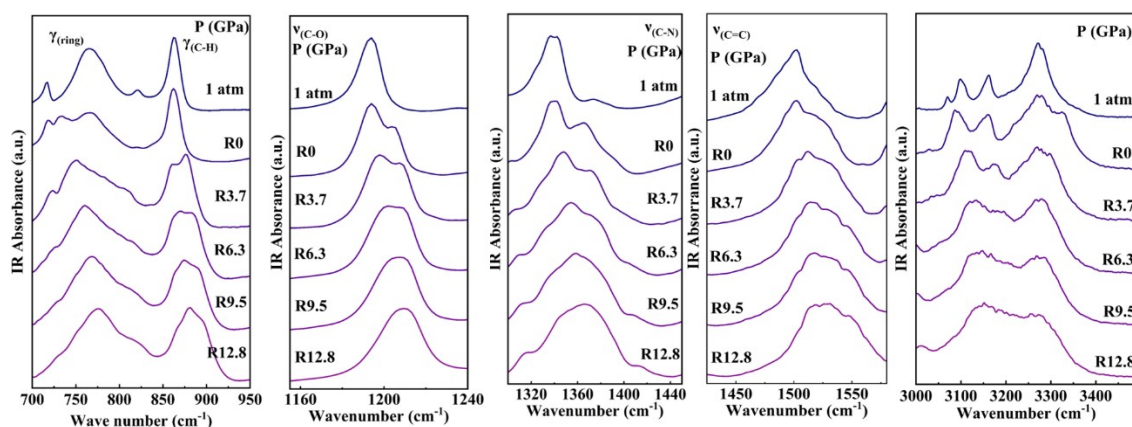

**Fig S11.** The IR spectra of ZnCl-G during decompression.

## ZnCl-B

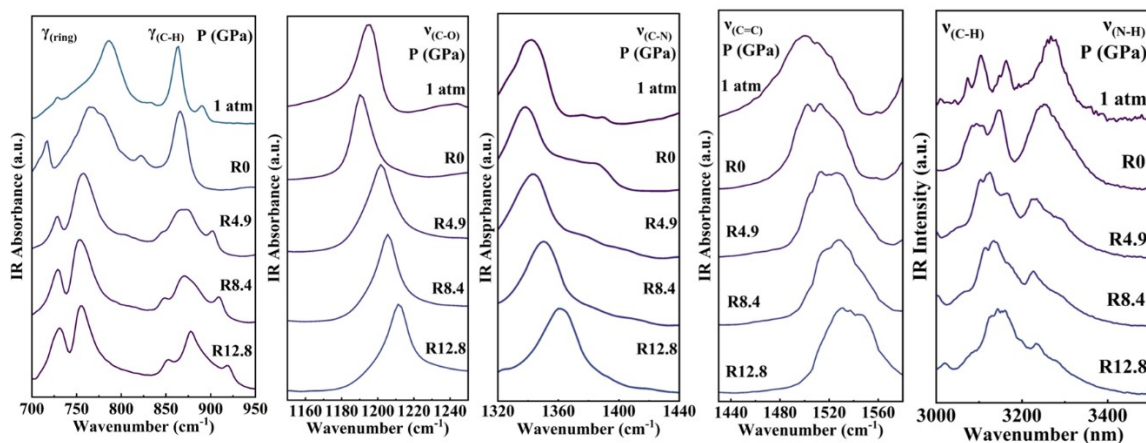



**Fig S12.** The IR spectra of ZnCl-B during decompression.

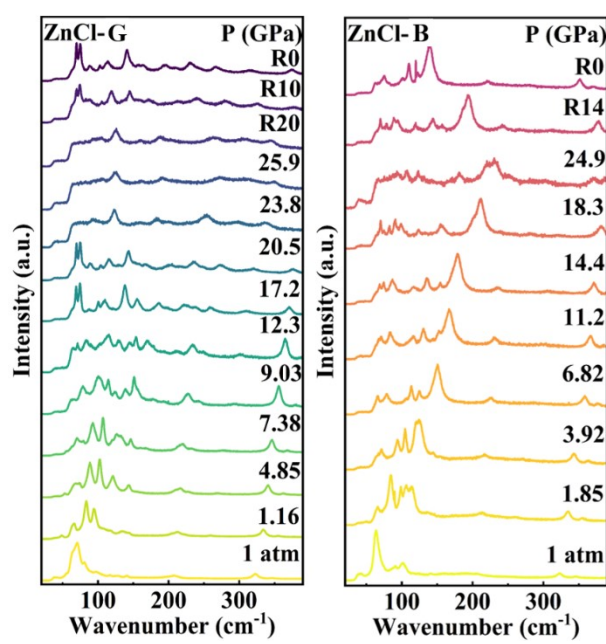

**Fig S13** The Raman Spectra of ZnCl-G/B with different pressures
